# Supplementary material for: Lack of ZNF365 Drives Senescence and Exacerbates Experimental Lung Fibrosis
Source: MDPI journal article supplement (doi:10.3390/cells11182848), 2022-09-13
Supplement: s1 [file s1]

**Supplementary Information**  
**Lack of ZNF365 Drives Senescence and Exacerbates Experimental Lung  
Fibrosis**

Juan Urista<sup>1</sup>, Mariel Maldonado<sup>2</sup>, Fernanda Toscano-Marquez<sup>1</sup>,  
Remedios Ramírez<sup>1</sup>, Yalbi Itzel Balderas-Martínez<sup>2</sup>, Carina Becerril<sup>2</sup>, Yair  
Romero<sup>1</sup>, Moisés Selman<sup>2</sup>, Annie Pardo<sup>1</sup>.

1 Facultad de Ciencias, Universidad Nacional Autónoma de México, México,  
Mexico.

2 Instituto Nacional de Enfermedades Respiratorias, “Ismael Cosío Villegas”,  
Mexico, Mexico.

Correspondence should be addressed to: [apardos@unam.mx](mailto:apardos@unam.mx)

## **SUPPLEMENTARY METHODS**

### **Single-cell RNA expression analysis**

Single-cell expression data were downloaded from GEO accession number GSE136831 [1] that had been previously annotated. We used R software version 4.1.0 [2], with Bioconductor version 3.13 [3]. We performed the normalization, scaling, Principal Component Analysis (PCA), and Uniform Manifold Approximation and Projection (UMAP) using the Seurat package version 4.1.1 [4]. Graphics were done using ggplot2 version 3.3.6 [5].

### **Real-time polymerase chain reaction (PCR)**

Supplementary reactions were performed using specific Taqman probes (Applied Biosystems) for Col1a1 (Hs00164004\_m1), Col3a1 (Hs00943809\_m1), and POLR2A (Hs00172187\_m1), or specific primer sequences and SybrGreen reagent

(ThermoFisher Scientific, catalog #K0222). QuantStudio 6 (ThermoFisher Scientific) thermalcycler was used for qPCR experiments, and 2- $\Delta$ Ct was used for data analysis. We provide primer sequences in the table below.

| Name        | Sequence (5' -> 3')    | oligo length (nt) |
|-------------|------------------------|-------------------|
| Hu CDKN1A-F | TGTCCGTCAGAACCCATGC    | 19                |
| Hu CDKN1A-R | AAAGTCGAAGTTCCATCGCTC  | 21                |
| Hu HPRT-R1  | GGCTTTGTATTTTGCTTTTCCA | 22                |
| Hu HPRT-F1  | AAGGACCCACGAAGTGTTG    | 20                |
| Hu TP53-F   | CAGCACATGACGGAGGTTGT   | 20                |
| Hu TP53-R   | TCATCCAAATACTCCACACGC  | 21                |

### Genotyping

Endpoint PCRs were performed according to the transgenic mice providers. Specific primers given in the technical sheet were designed and synthesized to detect the WT and KO mice strains [6-8].

## SUPPLEMENTARY FIGURES

A

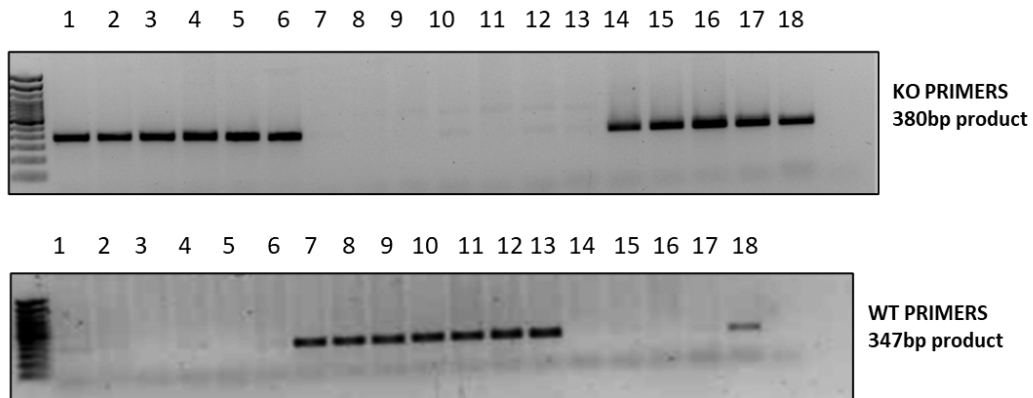

B

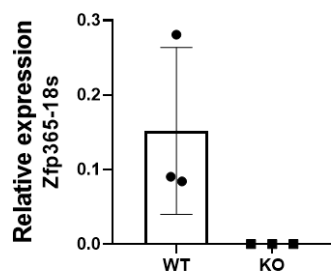

**Supplementary Figure S1.** A. DNA electrophoresis gel images with an example of the genotyping of WT (7-13) and KO (1-6; 14-17 and 18 is HT) mice. Each lane is numbered and represents one animal. WT oligonucleotides amplify a segment of the ZNF365 gene, while KO oligonucleotides amplify the cassette that disrupts *ZNF365* gene. B. PCR of relative expression of *ZNF365*.

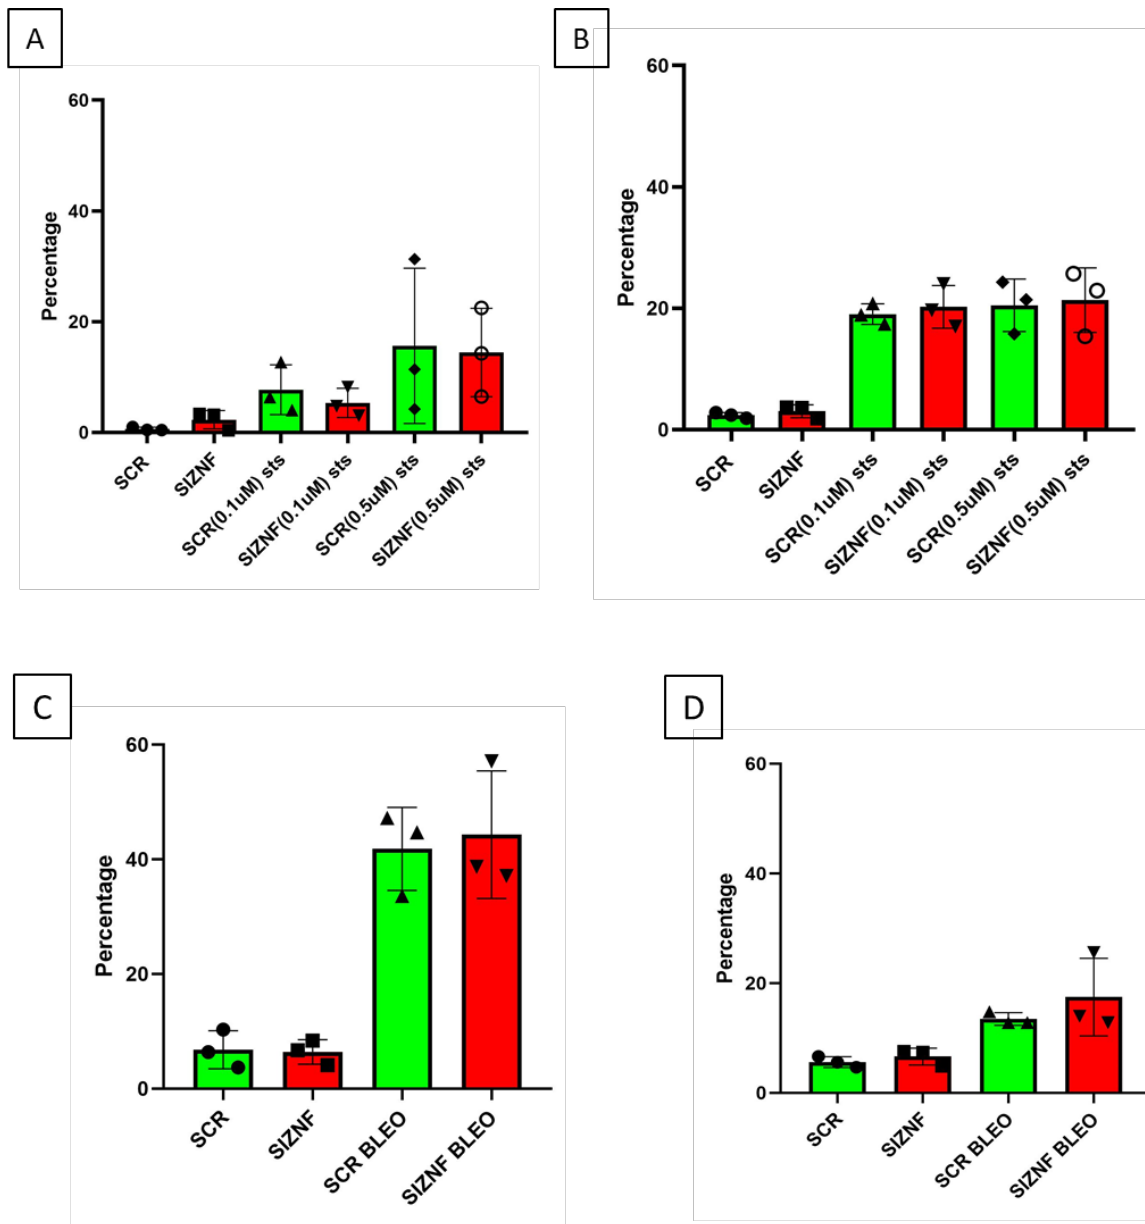

**Supplementary Figure S2. ZNF365 silencing does not affect the apoptotic rate in normal human lung fibroblasts and A549 cells under basal conditions and after an apoptotic stimulus.** A and B: Early and late percentage of basal apoptosis in normal human lung fibroblasts under basal conditions and after 0.1  $\mu$ M and 0.5  $\mu$ M staurosporine stimulation. C and D: Early and late percentage of apoptosis in A549 epithelial cells under basal conditions and after 30mU of bleomycin stimulation.

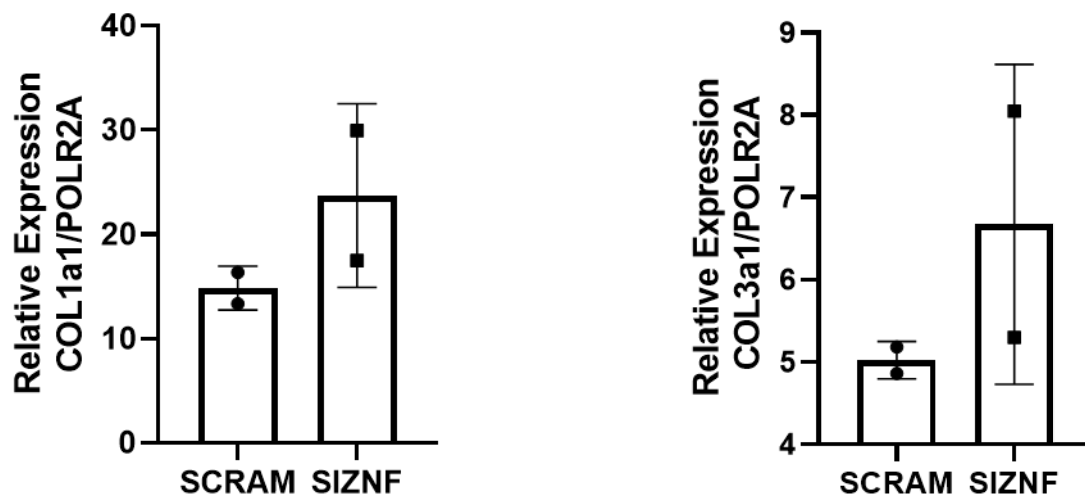

**Supplementary Figure S3. Silencing ZNF365 promotes the increase of *Col 1A1* and *Col 1A3* in human lung fibroblasts.** Figures represent the mean  $\pm$  S.D. of two independent experiments.

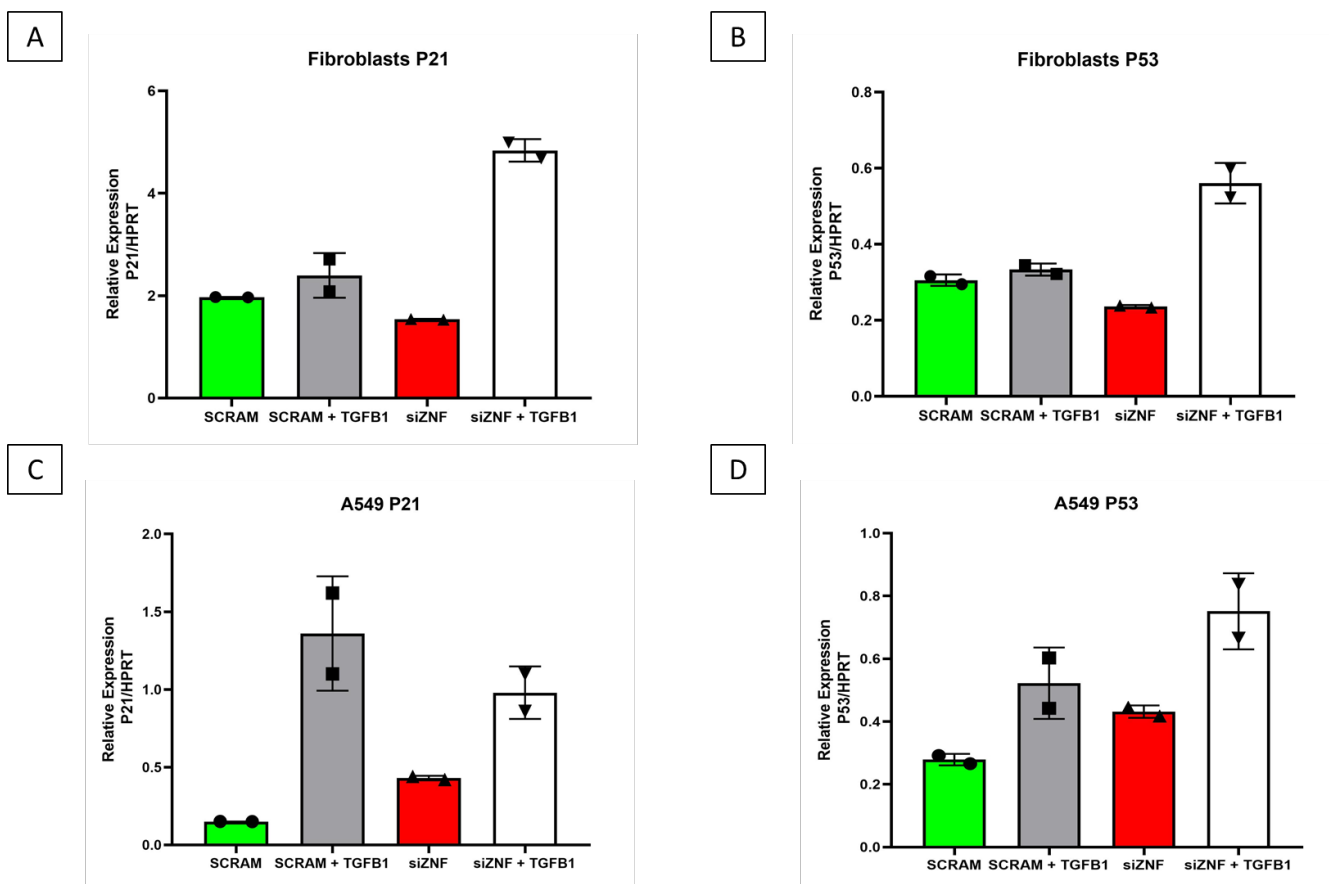

**Supplementary Figure S4. TGF $\beta$ -1 stimulation of silenced A549 cells and human lung fibroblasts promotes the expression of senescent markers.** A and B) *p21* and *p53* expression in normal human lung fibroblasts. C and D) *p21* and *p53* expression in A549 cells. Figures represent the mean  $\pm$  S.D. of two independent experiments.

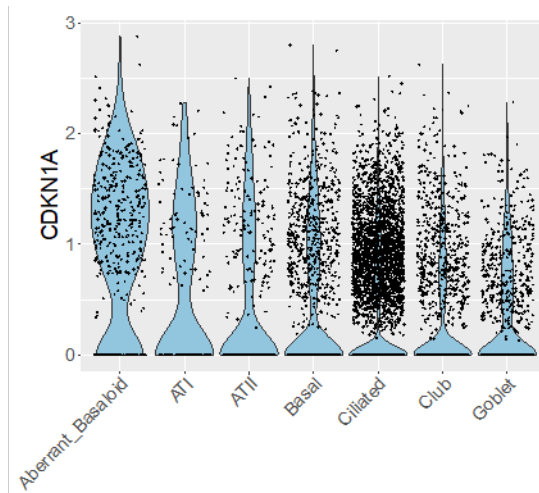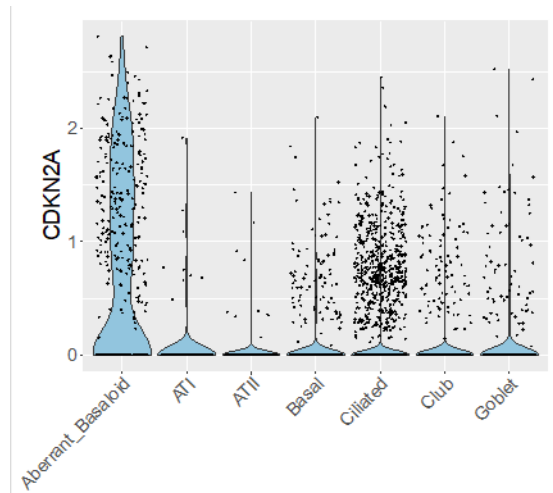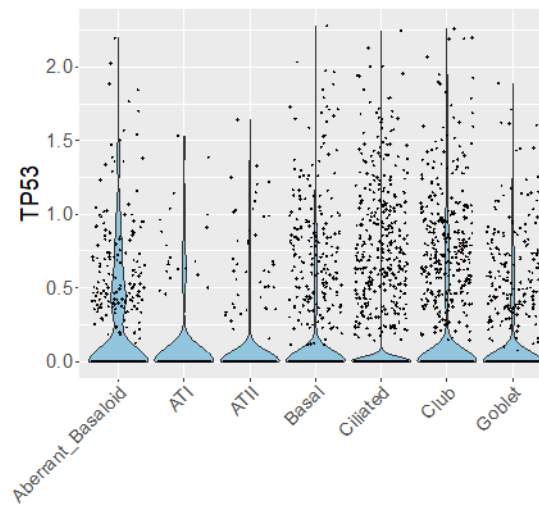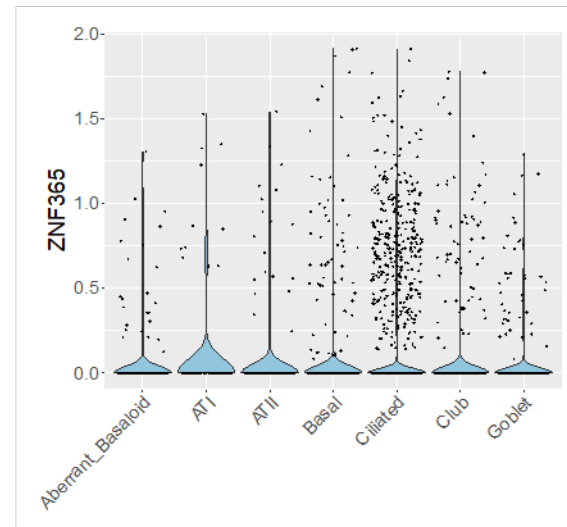

**Supplementary Figure S5.** Violin plot of the expression of selected genes in epithelial cells obtained from Idiopathic Pulmonary Fibrosis samples (GSE136831 dataset).

## References

1. Adams, T.S.; Schupp, J.C.; Poli, S.; Ayaub, E.A. Single-cell RNA-seq reveals ectopic and aberrant lung-resident cell populations in idiopathic pulmonary fibrosis. *Sci. Adv.* **2020**, *6*, eaba1983.
2. Team, R.C. Others. R: A language and environment for statistical computing. 2013
3. Gentleman, R.C.; Carey, V.J.; Bates, D.M.; Bolstad, B.; Dettling, M.; Dudoit, S. Bioconductor: open software development for computational biology and bioinformatics. *Genome Biol.* **2004**, *5*, R80.
4. Hao, Y. Integrated analysis of multimodal single-cell data. *Cell* **2021**, *184*, 3573 - 3587.e29
5. Wickham, H. *ggplot2: Elegant Graphics for Data Analysis*; Springer-Verlag New York, NY, USA, 2016.
6. [https://www.infracontier.eu/sites/infracontier.eu/files/upload/public/pdf/Resources%20and%20Services/eucomm-alleles-overview\\_infracontier-2016.pdf](https://www.infracontier.eu/sites/infracontier.eu/files/upload/public/pdf/Resources%20and%20Services/eucomm-alleles-overview_infracontier-2016.pdf) (accessed on 20 July 2022)
7. [https://www.infracontier.eu/sites/infracontier.eu/files/upload/public/pdf/Resources%20and%20Services/eucomm\\_komp-csd\\_allele\\_conversion\\_guide\\_v3a\\_2016.pdf](https://www.infracontier.eu/sites/infracontier.eu/files/upload/public/pdf/Resources%20and%20Services/eucomm_komp-csd_allele_conversion_guide_v3a_2016.pdf) (accessed on 20 July 2022)
8. [https://www.infracontier.eu/sites/infracontier.eu/files/upload/public/pdf/genotype\\_protocols/EM08383\\_genotype.pdf](https://www.infracontier.eu/sites/infracontier.eu/files/upload/public/pdf/genotype_protocols/EM08383_genotype.pdf) (accessed on 20 July 2022)
